# Supplementary material for: Barriers to the Implementation of Electroconvulsive Therapy (ECT): Results From a Nationwide Survey of ECT Practitioners
Source: Atypon-hosted journal article supplement (doi:10.1176/appi.ps.202000387), 2021-05-11
Supplement: appi.ps.202000387.ds001.pdf [file appi.ps.202000387.ds001.pdf]

## **Methods:**

In addition to asking about perceived barriers to expanding or starting an ECT service, the survey also inquired about provider demographics, experience, training, ECT service characteristics and approximate volumes. The survey was disseminated in two ways: through the email listserv for ISEN and via US mail service to ECT providers identified through Medicare Provider Utilization and Payment Database. As compensation for completing the survey, participants were offered an Amazon gift card (\$40) or that this amount would be donated to one of three charitable organizations. To be included, physicians must be currently practicing or have recently (within the last 3 years) practiced ECT in the United States. The Medicare Provider Utilization and Payment database is publicly available and contains the name and contact information of every physician providing a healthcare service to 10 or more Medicare beneficiaries in a given year. We used the most up-to-date data available at the time of project initiation (2016). The database was searched using the ECT current procedural terminology code (90870) to obtain the names and contact information of providers. In 2016, there were 690 providers listed in the database who provided ECT services to 10 or more Medicare beneficiaries.

**Table S1. Potential Barriers to Expanding an Existing ECT Service or Initiating a New Service**

|                                                                           |
|---------------------------------------------------------------------------|
| <b>Resources/Personnel</b>                                                |
| Lack of physical space                                                    |
| Lack of adequately trained colleagues/ECT practitioners                   |
| Lack of well-trained support staff – nursing                              |
| Lack of well-trained support staff – anesthesia                           |
| Lack of a “champion”                                                      |
| <b>Stigma</b>                                                             |
| Stigma on the part of patients                                            |
| Stigma on the part of medical staff (nursing, anesthesia, administration) |
| Stigma on part of referring providers (community psychiatrists)           |
| <b>Financial Issues</b>                                                   |
| Poor reimbursement rates                                                  |
| Insurance not covering ECT                                                |
| <b>Other Barriers</b>                                                     |
| Local legal barriers                                                      |
| Electronic medical record issues                                          |
| Lack of administrative support/bureaucratic issues                        |
| Lack of knowledge on part of potential referring providers                |
| Patient transportation/geographic barriers                                |
| Lack of appropriate patients                                              |
| Perceived inefficacy of treatment by patients                             |
| Perceived inefficacy of treatment by referring providers                  |
| Potential side-effects are not acceptable to patients                     |
| Potential side-effects are not acceptable to referring providers          |
| Inability to offer maintenance ECT                                        |
| Inability to offer outpatient ECT                                         |

**Table S2. Comparison of Survey Respondents to All ECT Providers in the Medicare Provider Utilization and Payment Database.**

| <b>Demographic</b>              | <b>Survey Respondents (n=192)</b> | <b>All ECT Providers (n=690)</b> | <b>Test Statistic</b> | <b>P value</b> |
|---------------------------------|-----------------------------------|----------------------------------|-----------------------|----------------|
| Male                            | 155 (81%)                         | 559 (81%)                        | $\chi^2 = 0.009$      | 0.926          |
| US Census Regional Distribution |                                   |                                  | $\chi^2 = 4.11$       | 0.250          |
| Northeast Area                  | 52 (29%)                          | 193 (28%)                        |                       |                |
| Midwest                         | 42 (23%)                          | 205 (30%)                        |                       |                |
| South                           | 57 (31%)                          | 202 (29%)                        |                       |                |
| West                            | 31 (17%)                          | 90 (13%)                         |                       |                |

**Table S3. Qualitative Data from Semi-Structured Interviews with ECT Practitioners (N=17)**

| Barrier                                                                 | Quote                                                                                                                                                                                                                                                                                                                                                                                                                                                                                                                                                                                                                                                                                                                                                                                                                                                                                       |
|-------------------------------------------------------------------------|---------------------------------------------------------------------------------------------------------------------------------------------------------------------------------------------------------------------------------------------------------------------------------------------------------------------------------------------------------------------------------------------------------------------------------------------------------------------------------------------------------------------------------------------------------------------------------------------------------------------------------------------------------------------------------------------------------------------------------------------------------------------------------------------------------------------------------------------------------------------------------------------|
| Stigma                                                                  | It's the most stigmatized treatment in the most stigmatized field of medicine now. <i>[Participant 1]</i>                                                                                                                                                                                                                                                                                                                                                                                                                                                                                                                                                                                                                                                                                                                                                                                   |
| Lack of administrative commitment/comparatively poor reimbursement rate | I had a beautiful dedicated ECT suite in the main hospital, and they sold it to [another clinical] department ... because they could make more money. <i>[Participant 7]</i>                                                                                                                                                                                                                                                                                                                                                                                                                                                                                                                                                                                                                                                                                                                |
| Lack of support staff                                                   | The biggest challenges are to do with anesthesia and nursing support. So, the anesthesia issue is that in many places anesthesiologists don't like doing ECT for several reasons: it delays them getting to their main cases in the OR [operating room], and some consider it not lucrative enough.... And you know, there's no pipeline to train nurses in ECT. <i>[Participant 7]</i>                                                                                                                                                                                                                                                                                                                                                                                                                                                                                                     |
| Lack of space (tied to comparatively poor reimbursement)                | There's competition for that [space] with pulmonologists, and especially the GI people [gastroenterologists], who do most of the work down there. And at that time there was only one anesthesiologist devoted to that room, and so it was a problem, and the other specialties bring ... in a lot more profit than we do. <i>[Participant 3]</i><br><br>The problem is that many places [put] their ECT services in PACU's [post-anesthesia care units], which are not designed for privacy for a patient, and when you're set up in a PACU ... [you have] very limited hours.... When they ... put us back in the PACU [they] said: you have to finish your ECT by nine o'clock. We had been doing 20 patients a day, so there is no way that we could do more than four patients which we'd start at 7:30 and have to be out of there by nine o'clock. <i>[Participant 7]</i>            |
| Transportation/ Geographic Disparity                                    | Another [patient] who's been getting ECT in [a remote state due to no closer access] ... it's about 300 miles away, out of state, out of network for almost 14 years. <i>[Participant 16]</i>                                                                                                                                                                                                                                                                                                                                                                                                                                                                                                                                                                                                                                                                                               |
| Lack of training opportunities/ requirements                            | A lot of residency programs really give short shrift to ECT, there may be ... a lecture or two and maybe, you know, they have some exposure to it, but there are many programs where ECT is not part of the psychiatry service, and unless they do an elective somewhere, residents may not really have any direct exposure to ECT. <i>[Participant 14]</i>                                                                                                                                                                                                                                                                                                                                                                                                                                                                                                                                 |
| Lack of education/stigma among medical peers                            | I went to the chief medical officer and started talking about doing outpatient ECT and stuff, and he says, well, before you go any further, does it really work? Does that really work? <i>[Participant 11]</i><br><br>I had a pretty ... surprising conversation with one of our faculty members who was warning a potential patient who had a feeding tube because of her depression severity that ECT was barbaric.... And it was her family who actually reached out to us directly because they weren't getting the referral from this particular provider. And she ended up being a fantastic ECT responder.... I dealt with that proactively and had some discussions with that provider [to] better understand his perspective. He was trained in the Middle East, and sure enough, ECT was used without anesthesia, and was used in a more punitive nature. <i>[Participant 4]</i> |

|                                                                           |                                                                                                                                                                                                                                                                                                                                                                                                                                                                                                                                                                                                                                                                                                                                                                                                                                                                                                                                                                                                                                                                                                                                                                                                                                                                                                                                                          |
|---------------------------------------------------------------------------|----------------------------------------------------------------------------------------------------------------------------------------------------------------------------------------------------------------------------------------------------------------------------------------------------------------------------------------------------------------------------------------------------------------------------------------------------------------------------------------------------------------------------------------------------------------------------------------------------------------------------------------------------------------------------------------------------------------------------------------------------------------------------------------------------------------------------------------------------------------------------------------------------------------------------------------------------------------------------------------------------------------------------------------------------------------------------------------------------------------------------------------------------------------------------------------------------------------------------------------------------------------------------------------------------------------------------------------------------------|
|                                                                           | <p>That's a common response. I didn't know you guys did that any more.<br/><i>[Participant 11]</i></p>                                                                                                                                                                                                                                                                                                                                                                                                                                                                                                                                                                                                                                                                                                                                                                                                                                                                                                                                                                                                                                                                                                                                                                                                                                                   |
| <p>Failed attempt to improve physical space barrier on national level</p> | <p>I initiated something back some years ago and we partnered with AAGP [American Association for Geriatric Psychiatry] with the geriatric organization and they had been also working with some former lobbyists who worked with Medicare, and we ... at least looked into the situation and submitted some data to CMS [Centers for Medicare and Medicaid Services], and posted something on their website. But nothing ever really came of that ... But then this came up again ... through ISEN [International Society of ECT and Neurostimulation], and ... a number of colleagues ... have expressed interest and [are] querulous about why can't we do ECT in ambulatory surgery. So we got together, and again, we partnered with people from APA [American Psychiatric Association] and AAGP again and [submitted] detailed paperwork and requests ... to CMS.... One of the editors of the American Journal [who] has a major role with the APA, came on board and helped ... write all the documentation, and ... this was posted and they had their period of review. And ... we got the response that it was rejected, and it did not appear to be for any ... safety issue or quality issue.... So they simply didn't approve it, but not for any ... good clinical reason, [but] we assume economic concerns. <i>[Participant 14]</i></p> |

**Table S4. Residency Programs that have produced the highest number of practicing ECT doctors among survey respondents.**

| Residency Program                        | Number of Survey Respondents | Percent | Cumulative Percent |
|------------------------------------------|------------------------------|---------|--------------------|
| Yale School of Medicine                  | 7                            | 4       | 4                  |
| Medical University of South Carolina     | 6                            | 3       | 7                  |
| Johns Hopkins University                 | 6                            | 3       | 10                 |
| Duke University                          | 5                            | 3       | 13                 |
| University of Michigan                   | 5                            | 3       | 15                 |
| West Virginia University                 | 5                            | 3       | 18                 |
| University of California-San Francisco   | 4                            | 2       | 20                 |
| Cleveland Clinic                         | 4                            | 2       | 22                 |
| University of Iowa                       | 4                            | 2       | 24                 |
| McLean Hospital/MGH (Harvard University) | 4                            | 2       | 26                 |
| Sheppard Pratt                           | 4                            | 2       | 28                 |
| Washington University (St. Louis)        | 4                            | 2       | 30                 |

**Table S5.** Stratified analysis of top 8 barriers to expanding an existing ECT service (mean  $\pm$  standard error) by age, sex, university-affiliated teaching hospital status, and volume of ECT treatments

|                                                                   | University-affiliated teaching hospital |                 |                       | Volume of ECT treatments |                 |                       |
|-------------------------------------------------------------------|-----------------------------------------|-----------------|-----------------------|--------------------------|-----------------|-----------------------|
|                                                                   | Yes (n=107)                             | No (n=45)       | t-statistic; <i>P</i> | Small (n=57)             | Large (n=76)    | t-statistic; <i>P</i> |
| Lack of physical space                                            | 1.93 $\pm$ 0.21                         | 0.98 $\pm$ 0.28 | 8.072; 0.005          | 1.44 $\pm$ 0.27          | 2.03 $\pm$ 0.26 | 2.960; 0.085          |
| Stigma on the part of patients                                    | 1.49 $\pm$ 0.18                         | 2.09 $\pm$ 0.32 | 1.769; 0.077          | 1.60 $\pm$ 0.23          | 1.75 $\pm$ 0.24 | 0.033; 0.856          |
| Patient transportation/<br>geographic barriers                    | 1.25 $\pm$ 0.15                         | 1.69 $\pm$ 0.25 | 1.581; 0.114          | 1.18 $\pm$ 0.20          | 1.47 $\pm$ 0.16 | 2.358; 0.125          |
| Lack of administrative<br>support/bureaucratic issues             | 1.34 $\pm$ 0.18                         | 1.07 $\pm$ 0.25 | -0.775; 0.439         | 1.37 $\pm$ 0.24          | 1.21 $\pm$ 0.21 | 0.847; 0.357          |
| Lack of adequately trained<br>colleagues/ECT practitioners        | 1.43 $\pm$ 0.18                         | 0.91 $\pm$ 0.25 | -1.772; 0.076         | 1.09 $\pm$ 0.24          | 1.13 $\pm$ 0.21 | 0.008; 0.927          |
| Potential side-effects are not<br>acceptable to patients          | 1.26 $\pm$ 0.16                         | 1.24 $\pm$ 0.25 | -0.081; 0.936         | 0.93 $\pm$ 0.21          | 1.26 $\pm$ 0.19 | 2.109; 0.146          |
| Lack of knowledge on the part<br>of potential referring providers | 0.86 $\pm$ 0.15                         | 1.40 $\pm$ 0.25 | 2.135; 0.033          | 1.25 $\pm$ 0.26          | 1.17 $\pm$ 0.18 | 0.118; 0.731          |
| Poor reimbursement rates                                          | 0.78 $\pm$ 0.14                         | 1.07 $\pm$ 0.28 | 0.381; 0.703          | 1.11 $\pm$ 0.23          | 0.76 $\pm$ 0.18 | 1.310; 0.252          |

Note: *P*-values were estimated from Kruskal–Wallis rank-sum tests. ECT services were categorized as small (<21) or large ( $\geq$ 40) on estimated number of ECT treatment per week.

**Table S6.** Stratified analysis of top 8 barriers to initiating a new ECT service (mean  $\pm$  standard error) by age, sex, university-affiliated teaching hospital status, and volume of ECT treatments

|                                                    | University-affiliated teaching hospital |                 |                       | Volume of ECT treatments |                 |                       |
|----------------------------------------------------|-----------------------------------------|-----------------|-----------------------|--------------------------|-----------------|-----------------------|
|                                                    | Yes (n=95)                              | No (n=38)       | t-statistic; <i>P</i> | Small (n=50)             | Large (n=65)    | t-statistic; <i>P</i> |
| Lack of well-trained colleagues/ECT practitioners  | 2.79 $\pm$ 0.21                         | 2.08 $\pm$ 0.37 | 2.049; 0.152          | 2.20 $\pm$ 0.32          | 2.38 $\pm$ 0.25 | 0.142; 0.706          |
| Lack of a champion                                 | 2.21 $\pm$ 0.21                         | 1.39 $\pm$ 0.33 | 4.679; 0.031          | 1.80 $\pm$ 0.30          | 1.95 $\pm$ 0.26 | 0.251; 0.616          |
| Lack of physical space                             | 1.59 $\pm$ 0.19                         | 1.50 $\pm$ 0.32 | 0.394; 0.531          | 1.32 $\pm$ 0.26          | 1.97 $\pm$ 0.25 | 3.136; 0.077          |
| Lack of administrative support/bureaucratic issues | 1.74 $\pm$ 0.20                         | 1.24 $\pm$ 0.30 | 2.243; 0.134          | 1.34 $\pm$ 0.24          | 1.86 $\pm$ 0.25 | 1.671; 0.196          |
| Lack of well-training support staff (Nursing)      | 1.16 $\pm$ 0.17                         | 0.84 $\pm$ 0.24 | 0.683; 0.409          | 0.66 $\pm$ 0.20          | 1.28 $\pm$ 0.21 | 5.279; 0.022          |
| Stigma on part of patients                         | 0.97 $\pm$ 0.16                         | 1.55 $\pm$ 0.34 | 1.589; 0.207          | 1.32 $\pm$ 0.27          | 0.89 $\pm$ 0.19 | 0.564; 0.453          |
| Poor reimbursement rates                           | 0.68 $\pm$ 0.15                         | 1.00 $\pm$ 0.26 | 1.640; 0.200          | 1.20 $\pm$ 0.24          | 0.60 $\pm$ 0.18 | 7.241; 0.007          |
| Patient transportation/geographic barriers         | 0.55 $\pm$ 0.11                         | 0.84 $\pm$ 0.22 | 2.010; 0.156          | 0.68 $\pm$ 0.18          | 0.45 $\pm$ 0.12 | 1.015; 0.314          |

Note: *P*-values were estimated from Kruskal–Wallis rank-sum tests. Volume of ECT treatments was categorized as small (<21) or large ( $\geq$ 40) on a weekly basis.



**Table S7. Number of ECT providers per state and per Census division, based on the Medicare Provider Utilization and Payment Database (2016 data).**

| <b>Census Division/State</b>           | <b>No. of ECT Providers/State</b> | <b>Population (2016 Census)</b> | <b># of ECT providers per 100,000 people per state</b> |
|----------------------------------------|-----------------------------------|---------------------------------|--------------------------------------------------------|
| <b>Division 1 - New England</b>        | <b>92</b>                         | <b>14,755,800</b>               | <b>6.2</b>                                             |
| Connecticut                            | 13                                | 3,578,141                       | 3.6                                                    |
| Maine                                  | 17                                | 1,331,317                       | 12.8                                                   |
| Massachusetts                          | 37                                | 6,823,608                       | 5.4                                                    |
| New Hampshire                          | 11                                | 1,342,307                       | 8.2                                                    |
| Rhode Island                           | 9                                 | 1,056,770                       | 8.5                                                    |
| Vermont                                | 5                                 | 623,657                         | 8.0                                                    |
| <b>Division 2 - Middle Atlantic</b>    | <b>101</b>                        | <b>41,286,530</b>               | <b>2.4</b>                                             |
| New Jersey                             | 21                                | 8,870,827                       | 2.4                                                    |
| New York                               | 51                                | 19,633,428                      | 2.6                                                    |
| Pennsylvania                           | 29                                | 12,782,275                      | 2.3                                                    |
| <b>Division 3 - East North Central</b> | <b>96</b>                         | <b>46,812,400</b>               | <b>2.1</b>                                             |
| Indiana                                | 13                                | 6,634,304                       | 2.0                                                    |
| Illinois                               | 32                                | 12,820,527                      | 2.5                                                    |
| Michigan                               | 22                                | 9,950,571                       | 2.2                                                    |
| Ohio                                   | 22                                | 11,634,370                      | 1.9                                                    |
| Wisconsin                              | 7                                 | 5,772,628                       | 1.2                                                    |
| <b>Division 4 - West North Central</b> | <b>109</b>                        | <b>21,175,140</b>               | <b>5.1</b>                                             |
| Iowa                                   | 8                                 | 3,131,371                       | 2.6                                                    |
| Kansas                                 | 9                                 | 2,910,844                       | 3.1                                                    |
| Minnesota                              | 39                                | 5,522,744                       | 7.1                                                    |

|              |    |           |     |
|--------------|----|-----------|-----|
| Missouri     | 31 | 6,087,135 | 5.1 |
| Nebraska     | 12 | 1,905,616 | 6.3 |
| North Dakota | 4  | 754,434   | 5.3 |
| South Dakota | 6  | 862,996   | 7.0 |

|                                    |            |                   |            |
|------------------------------------|------------|-------------------|------------|
| <b>Division 5 - South Atlantic</b> | <b>128</b> | <b>63,907,311</b> | <b>2.0</b> |
| Delaware                           | 2          | 948,921           | 2.1        |
| D.C.                               | 2          | 685,815           | 2.9        |
| Florida                            | 31         | 20,613,477        | 1.5        |
| Georgia                            | 15         | 10,301,890        | 1.5        |
| Maryland                           | 11         | 6,003,323         | 1.8        |
| North Carolina                     | 30         | 10,154,788        | 3.0        |
| South Carolina                     | 12         | 4,957,968         | 2.4        |
| Virginia                           | 20         | 8,410,106         | 2.4        |
| West Virginia                      | 5          | 1,831,023         | 2.7        |

|                                        |           |                   |            |
|----------------------------------------|-----------|-------------------|------------|
| <b>Division 6 - East South Central</b> | <b>36</b> | <b>18,935,655</b> | <b>1.9</b> |
| Alabama                                | 5         | 4,863,525         | 1.0        |
| Kentucky                               | 5         | 4,438,182         | 1.1        |
| Mississippi                            | 5         | 2,987,938         | 1.7        |
| Tennessee                              | 21        | 6,646,010         | 3.2        |

|                                        |           |                   |            |
|----------------------------------------|-----------|-------------------|------------|
| <b>Division 7 - West South Central</b> | <b>38</b> | <b>39,508,794</b> | <b>1.0</b> |
| Arkansas                               | 3         | 2,989,918         | 1.0        |
| Louisiana                              | 2         | 4,678,135         | 0.4        |
| Oklahoma                               | 3         | 3,926,331         | 0.8        |
| Texas                                  | 30        | 27,914,410        | 1.1        |

|                              |           |                   |            |
|------------------------------|-----------|-------------------|------------|
| <b>Division 8 - Mountain</b> | <b>29</b> | <b>23,838,802</b> | <b>1.2</b> |
| Arizona                      | 8         | 6,941,072         | 1.2        |

|            |   |           |     |
|------------|---|-----------|-----|
| Colorado   | 6 | 5,539,215 | 1.1 |
| Idaho      | 0 | 1,682,380 | 0.0 |
| New Mexico | 4 | 2,091,630 | 1.9 |
| Montana    | 1 | 1,040,859 | 1.0 |
| Utah       | 8 | 3,041,868 | 2.6 |
| Nevada     | 0 | 2,917,563 | 0.0 |
| Wyoming    | 2 | 584,215   | 3.4 |

|                             |           |                   |            |
|-----------------------------|-----------|-------------------|------------|
| <b>Division 9 - Pacific</b> | <b>61</b> | <b>52,720,879</b> | <b>1.2</b> |
| Alaska                      | 0         | 741,456           | 0.0        |
| California                  | 45        | 39,167,117        | 1.1        |
| Hawaii                      | 2         | 1,427,559         | 1.4        |
| Oregon                      | 3         | 4,089,976         | 0.7        |
| Washington                  | 11        | 7,294,771         | 1.5        |
